# Supplementary material for: Influence of age and level of activity on the applicability of a walker orthosis - a prospective study in different cohorts of healthy volunteers
Source: BMC Musculoskelet Disord. 2018 Dec 22;19:453. doi: 10.1186/s12891-018-2366-2 (PMC6303910; doi:10.1186/s12891-018-2366-2)
Supplement: Supplementary file 1 — Detailed data for strap tightness. Shows the data for each strap separately at t0 and t1. (XLSX 37 kb) [file 12891_2018_2366_MOESM1_ESM.xlsx]

## Sheet: Sheet1
Time	Strap #	Level of activity	Mean (SD)	Sport	Cardio	Senior
t0	1	Sport	1.5 (0.6)
		Cardio	2.1 (0.5)	0.164
		Senior	3.8 (0.9)	<0.001	<0.001
		Reference	1.9 (0.3)	1.0	1.0	<0.001
	2	Sport	2.1 (0.3)
		Cardio	2.4 (0.9)	1.0
		Senior	3.8 (1.0)	<0.001	<0.001
		Reference	2.2 (0.4)	1.0	1.0	<0.001
	3	Sport	1.9 (0.8)
		Cardio	2.5 (0.6)	0.254
		Senior	3.0 (1.0)	0.007	0.793
		Reference	2.1 (0.6)	1.0	1.0	0.065
	4	Sport	2.4 (0.5)
		Cardio	3.1 (0.9)	0.184
		Senior	4.1 (0.9)	<0.001	0.016
		Reference	2.9 (0.3)	0.644	1.0	0.004
t1	1	Sport	1.4 (0.6)
		Cardio	2.2 (0.5)	0.007
		Senior	3.3 (0.5)	<0.001	<0.001
		Reference	1.9 (0.3)	0.251	0.963	<0.001
	2	Sport	2.2 (0.6)
		Cardio	2.2 (0.4)	1.0
		Senior	3.6 (1.0)	<0.001	<0.001
		Reference	2.2 (0.4)	1.0	1.0	<0.001
	3	Sport	2.1 (0.9)
		Cardio	2.4 (0.6)	1.0
		Senior	3.3 (1.1)	0.020	0.135
		Reference	2.1 (0.6)	1.0	1.0	0.028
	4	Sport	1.9 (0.7)
		Cardio	2.8 (0.5)	0.007
		Senior	4.0 (0.9)	<0.001	0.003
		Reference	2.9 (0.3)	0.004	1.0	0.007
